# Supplementary material for: K13 Blocks KSHV Lytic Replication and Deregulates vIL6 and hIL6 Expression: A Model of Lytic Replication Induced Clonal Selection in Viral Oncogenesis
Source: PubMed Central journal article supplement (PMC2020437; doi:10.1371/journal.pone.0001067), 2007-10-24
Supplement: pone.0001067.s003.pdf [file pone.0001067.s003.pdf]

**Supplementary Table 1. Sequence of siRNA oligonucleotides**

| <b>Name</b>   | <b>Sequence</b>             |
|---------------|-----------------------------|
| K13 siRNA     | 5'-AACGUGUUCAUACCUCAACCC-3' |
| Control siRNA | 5'-AAGCGCGCUUUGUAGGAUUCG-3' |
