# Supplementary material for: K13 Blocks KSHV Lytic Replication and Deregulates vIL6 and hIL6 Expression: A Model of Lytic Replication Induced Clonal Selection in Viral Oncogenesis
Source: PubMed Central journal article supplement (PMC2020437; doi:10.1371/journal.pone.0001067), 2007-10-24
Supplement: pone.0001067.s004.pdf [file pone.0001067.s004.pdf]

**Supplementary Table 2: Sequence of primers used for RT-PCR and qRT-PCR analyses.**

| Gene Name | Forward Primer           | Reverse Primer          |
|-----------|--------------------------|-------------------------|
| K1        | AAACAACGTGACTCAAACAAAACA | TCTTCCGTGCACAAATCGTG    |
| K2        | ACCCTTGCAGATGCCGG        | GGATGCTATGGGTGATCGATG   |
| K4        | TTGTCCGGTCTATGCCAGG      | CTGCCTTGCTTTGTTTCAA     |
| K8.1      | AAAGCGTCCAGGCCACCACAGA   | GGCAGAAAATGGCACACGGTTAC |
| K9/MRF-1  | CGGCATAGCTGTGCTTACCA     | CATTGTCCCGCAACCAGACT    |
| K10       | CCCAACAGGCCAGCTACATAA    | CTTCGTGGAACCTCTGAGACGC  |
| K11       | ATCCGAGTCATATTCAGGCGA    | AATCGAGAACCTGAAGGGTCC   |
| K13       | GGATGCCCTAATGTCAATGC     | GGCGATAGTGTTGGAGTGT     |
| ORF50     | CACAAAAATGGCGCAAGATGA    | TGGTAGAGTTGGGCCTTCAGTT  |
| GNB2L     | GAGTGTGGCCTTCTCCTCTG     | GCTTGCAGTTAGCCAGGTTTC   |
